# Supplementary material
Source: Springer Nature journal article supplement (https://www.springermedizin.de/resource/supplementary/12970_2007_47_MOESM4_ESM.pdf/9594242)
Supplement: MOESM4 [file 9594242]

| Occupation                        | N   | Occupation                                                   | N   |
|-----------------------------------|-----|--------------------------------------------------------------|-----|
| Athlete/Coach                     | 8   | Health Care                                                  | 112 |
| Banking/Finance/Accounting        | 92  | IT/Computer                                                  | 99  |
| Business Owner/Self Employed      | 130 | Law Enforcement/Fire<br>Fighter/Corrections/Security/Bouncer | 77  |
| Customer Service/Service          | 49  | Legal                                                        | 20  |
| Engineering/Architect             | 93  | Military                                                     | 30  |
| Entertainment/Art                 | 54  | Sales/Marketing                                              | 149 |
| Executive/Management              | 194 | Scientist/Education                                          | 57  |
| Fitness Industry/Personal Trainer | 76  | Skilled Labor/Labor                                          | 213 |

\*Table does not include all occupations

\*\*Respondents who listed a job and student status are not included in these figures
